# Supplementary material for: Metabolomic analysis of urethane-induced lung carcinogenesis in rats and the ameliorative effect of Qi-Yu-San-Long decoction
Source: Royal Society of Chemistry journal article supplement (doi:10.1039/d4ay02165g), 2025-01-01
Supplement: d4ay02165g1.pdf [file d4ay02165g1.pdf]

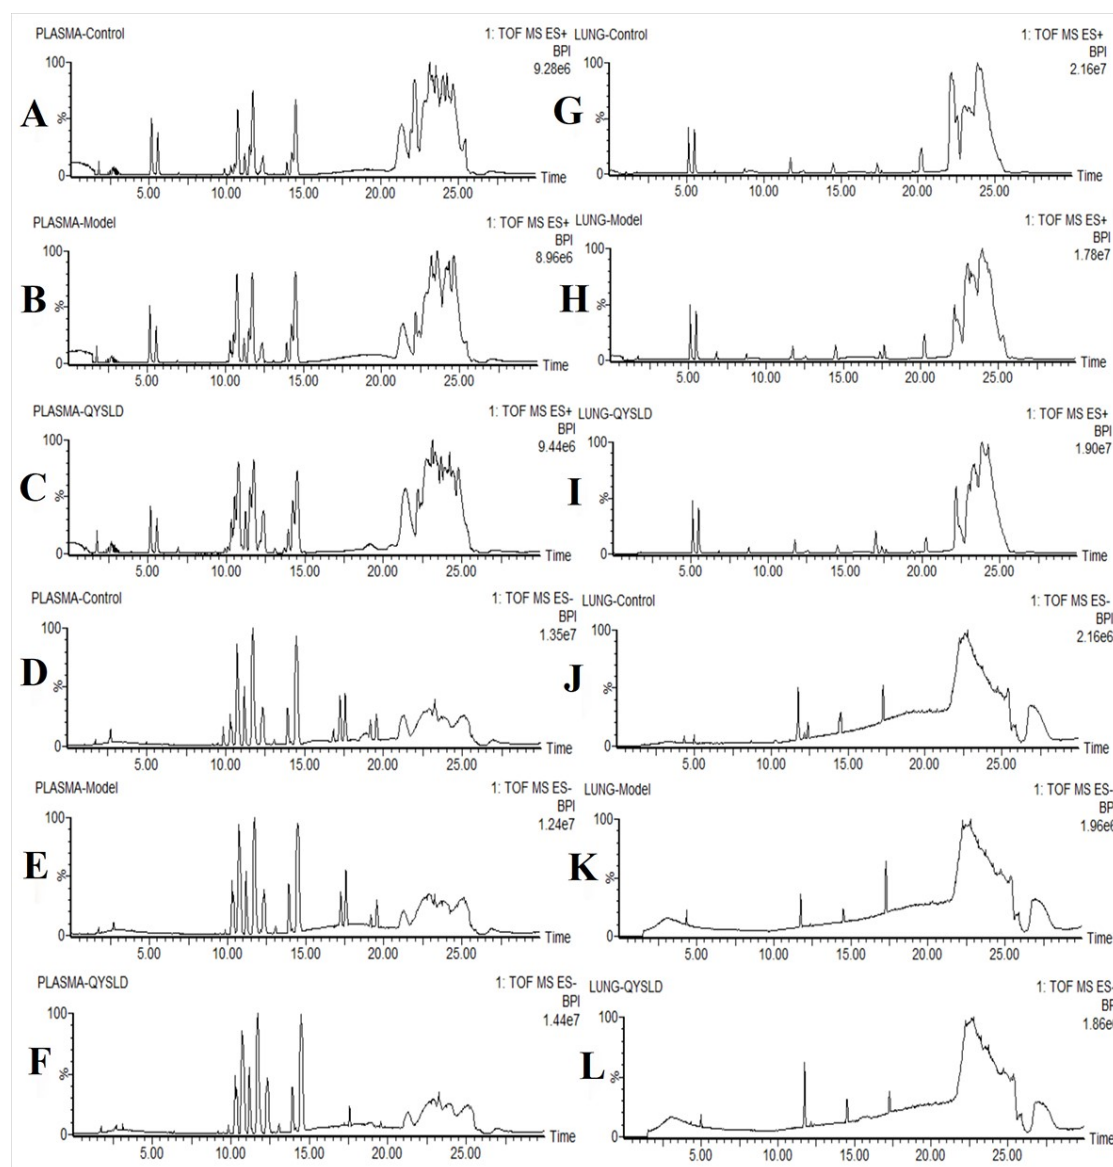

Figure S1 Representative BPIs of rat plasma samples of control (A, D), model (B, E) and QYSLD groups (C, F) acquired in the ESI<sup>+</sup> and ESI<sup>-</sup> mode by UPLC-Q-TOF/MS; Representative BPIs of rats lung tissue samples of control (G, J), model (H, K) and QYSLD groups (I, L) acquired in the ESI<sup>+</sup> and ESI<sup>-</sup> mode by UPLC-Q-TOF/MS.
