# Supplementary material for: Metabolomic analysis of urethane-induced lung carcinogenesis in rats and the ameliorative effect of Qi-Yu-San-Long decoction
Source: Royal Society of Chemistry journal article supplement (doi:10.1039/d4ay02165g), 2025-01-01
Supplement: d4ay02165g2.pdf [file d4ay02165g2.pdf]

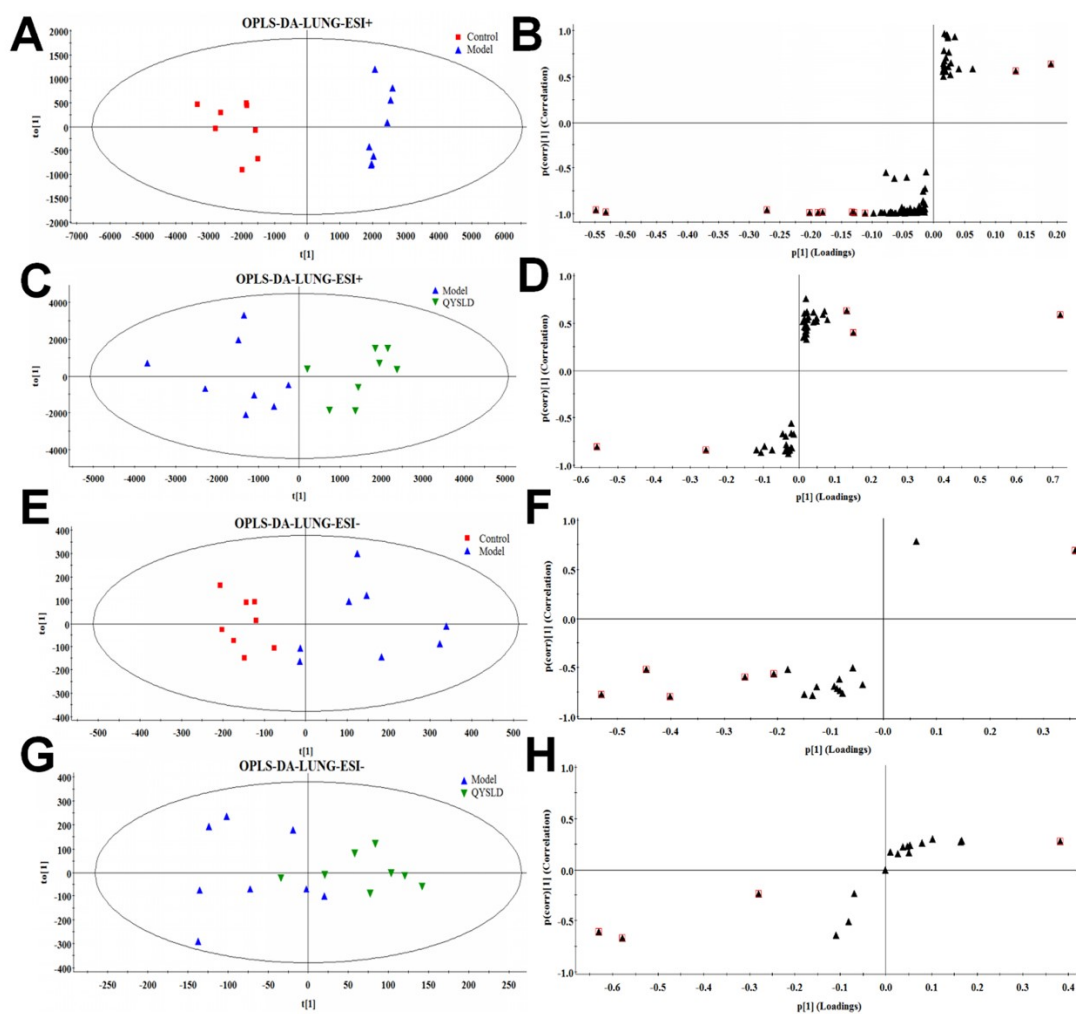

Figure S2 Lung OPLS-DA score plots and their corresponding S-plots in dual ESI ion mode of the control group and model group (ESI<sup>+</sup> mode: (A, B) ( $R^2Y=95\%$ ,  $Q^2=93\%$ ,  $p[\text{CV-ANOVA}]=1.20\times 10^{-6}$ ); ESI<sup>-</sup> mode: (E, F) ( $R^2Y=72\%$ ,  $Q^2=62\%$ ,  $p[\text{CV-ANOVA}]=1.39\times 10^{-2}$ )). Lung OPLS-DA score plots and their corresponding S-plots in dual ESI ion mode of the model group and QYSLD group (ESI<sup>+</sup> mode: (C, D) ( $R^2Y=75\%$ ,  $Q^2=65\%$ ,  $p[\text{CV-ANOVA}]=5.81\times 10^{-3}$ ); ESI<sup>-</sup> mode: (G, H) ( $R^2Y=45\%$ ,  $Q^2=41\%$ ,  $p[\text{CV-ANOVA}]=2.9\times 10^{-2}$ )).
