# Supplementary material for: Metabolomic analysis of urethane-induced lung carcinogenesis in rats and the ameliorative effect of Qi-Yu-San-Long decoction
Source: Royal Society of Chemistry journal article supplement (doi:10.1039/d4ay02165g), 2025-01-01
Supplement: d4ay02165g3.pdf [file d4ay02165g3.pdf]

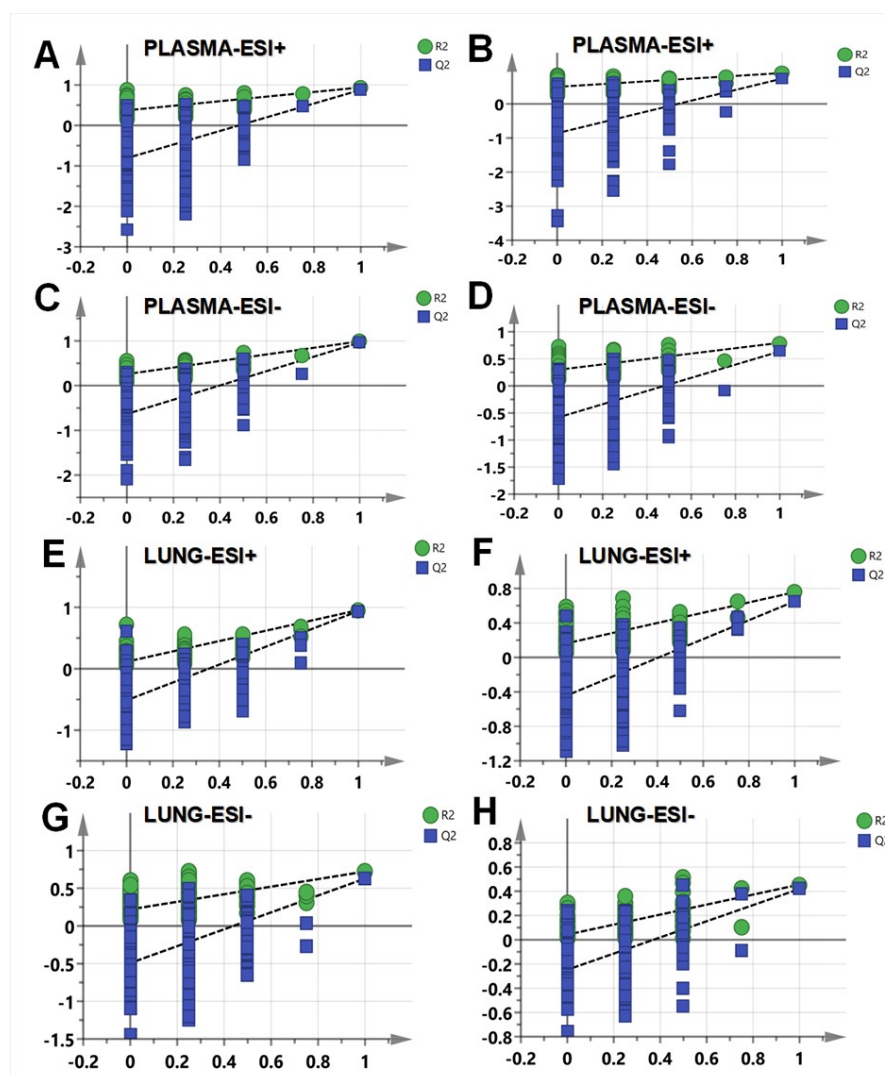

Figure S3 Permutation test plots of plasma samples in ESI<sup>+</sup> mode (A) and ESI<sup>-</sup> mode (C) for the control and model groups; permutation test plots of plasma samples in ESI<sup>+</sup> mode (B) and ESI<sup>-</sup> mode (D) for the model and QYSLD groups. Permutation test plots of lung tissue samples in ESI<sup>+</sup> mode (E) and ESI<sup>-</sup> mode (G) for the control and model groups; permutation test plots of lung tissue samples in ESI<sup>+</sup> mode (F) and ESI<sup>-</sup> mode (H) for the model and QYSLD groups.
