# Supplementary material for: Metabolomic analysis of urethane-induced lung carcinogenesis in rats and the ameliorative effect of Qi-Yu-San-Long decoction
Source: Royal Society of Chemistry journal article supplement (doi:10.1039/d4ay02165g), 2025-01-01
Supplement: d4ay02165g4.pdf [file d4ay02165g4.pdf]

## SUPPLEMENTARY INFORMATION

### Metabolomic analysis of urethane-induced lung carcinogenesis in rats and the ameliorative effect of Qi-Yu-San-Long decoction

Lanying Li,<sup>a</sup> Chang Chen,<sup>a</sup> Rui Yang,<sup>a</sup> Ziqi Wei,<sup>a</sup> Ting Zheng,<sup>a</sup> Zegeng Li<sup>b</sup> and Huan Wu,<sup>\*abc</sup>

a. College of pharmacy, Anhui University of Chinese Medicine, Hefei 230012, China

b. Anhui Province Key Laboratory of the Application and Transformation of Traditional Chinese Medicine in the Prevention and Treatment of Major Pulmonary Diseases, Hefei 230031, China

c. Department of Nutrition and Food Science, University of Maryland, College Park, Maryland 20742, United States.

\*Corresponding author E-mail: wuhuancpu@ahtcm.edu.cn (H. Wu)

#### Table caption

Table S1 Chromatography and mass spectrometry parameters.

Table S2 Potential discriminatory biomarkers in plasma and lung tissues of rats in the control, model and QYSLD groups detected by UPLC-Q-TOF/MS.

#### Figure caption

Figure S1 Representative BPIs of rat plasma samples of control (A, D), model (B, E) and QYSLD groups (C, F) acquired in the ESI<sup>+</sup> and ESI<sup>-</sup> mode by UPLC-Q-TOF/MS; Representative BPIs of rats lung tissue samples of control (G, J), model (H, K) and QYSLD groups (I, L) acquired in the ESI<sup>+</sup> and ESI<sup>-</sup> mode by UPLC-Q-TOF/MS.

Figure S2 Lung OPLS-DA score plots and their corresponding S-plots in dual ESI ion mode of the control group and model group (ESI<sup>+</sup> mode: (A, B) ( $R^2Y=95\%$ ,  $Q^2=93\%$ ,  $p[CV-ANOVA]=1.20\times10^{-6}$ ); ESI<sup>-</sup> mode: (E, F) ( $R^2Y=72\%$ ,  $Q^2=62\%$ ,  $p[CV-ANOVA]=1.39\times10^{-2}$ )). Lung OPLS-DA score plots and their corresponding S-plots in dual ESI ion mode of the model group and QYSLD group (ESI<sup>+</sup> mode: (C, D) ( $R^2Y=75\%$ ,  $Q^2=65\%$ ,  $p[CV-ANOVA]=5.81\times10^{-3}$ ); ESI<sup>-</sup> mode: (G, H) ( $R^2Y=45\%$ ,  $Q^2=41\%$ ,  $p[CV-ANOVA]=2.9\times10^{-2}$ )).

Figure S3 Permutation test plots of plasma samples in ESI<sup>+</sup> mode (A) and ESI<sup>-</sup> mode (C) for the control and model groups; permutation test plots of plasma samples in ESI<sup>+</sup> mode (B) and ESI<sup>-</sup> mode (D) for

the model and QYSLD groups. Permutation test plots of lung tissue samples in ESI<sup>+</sup> mode (E) and ESI<sup>-</sup> mode (G) for the control and model groups; permutation test plots of lung tissue samples in ESI<sup>+</sup> mode (F) and ESI<sup>-</sup> mode (H) for the model and QYSLD groups.

Table S1 Chromatography and mass spectrometry parameters.

| Chromatography         |                         |                                                         |                                                    |                                                     |                                                                                                                 |                       |                                                             |
|------------------------|-------------------------|---------------------------------------------------------|----------------------------------------------------|-----------------------------------------------------|-----------------------------------------------------------------------------------------------------------------|-----------------------|-------------------------------------------------------------|
| Column temperature     | Injection volume        | Flow rate                                               | Chromatographic column                             | Mobile phases                                       | Mobile phase gradient elution procedure                                                                         |                       |                                                             |
| 40 °C                  | 2 μL                    | 0.2 mL·min <sup>-1</sup>                                | BEH C <sub>18</sub> column (100 mm×2.1 mm, 1.7 μm) | A: 0.1% v/v formic acid in water<br>B: acetonitrile | 0-4 min, 92%–60% A;<br>4-19 min, 60%–15% A;<br>19-24 min, 15%–5% A;<br>24-27 min, 5%–92% A;<br>27-30 min, 92% A |                       |                                                             |
| Mass spectrometry      |                         |                                                         |                                                    |                                                     |                                                                                                                 |                       |                                                             |
| Ion source temperature | Scanning range          | Capillary voltage                                       | Voltage of cone                                    | Gas flow of the cone                                | Desolvation temperature                                                                                         | Gas flow rate         | Collision energy                                            |
| 120 °C                 | <i>m/z</i> : 50–1200 Da | ESI <sup>+</sup> : 3.0 KV;<br>ESI <sup>-</sup> : 2.5 KV | 40 V                                               | 40 L·h <sup>-1</sup>                                | 400 °C                                                                                                          | 600 L·h <sup>-1</sup> | low collision energy: 6 V;<br>high collision energy: 15~40V |

Table S2 Potential discriminatory biomarkers in plasma and lung tissues of rats in the control, model and QYSLD groups detected by UPLC-Q-TOF/MS.

| Metabolite | <i>m/z</i> | <i>T<sub>R</sub></i> | Possible<br>MS/MS | FC   |      | VIP  |      | Trend |     | source                        |
|------------|------------|----------------------|-------------------|------|------|------|------|-------|-----|-------------------------------|
|            |            |                      |                   | M    | Q    | M    | Q    | M     | Q   |                               |
|            |            |                      |                   | VS.  | VS.  | VS.  | VS.  | VS.   | VS. |                               |
|            |            |                      |                   | C    | M    | C    | M    | C     | M   |                               |
| unknown    | 447.2518   | 13.78                | 283.2629          | 4.06 | 1.40 | 3.84 | 3.94 | ↑     | ↓   | Plasma<br>(ESI <sup>-</sup> ) |
| unknown    | 706.8040   | 23.02                | 361.2717          | 1.59 | 0.52 | 3.67 | 3.70 | ↑     | ↓   | Lung<br>(ESI <sup>+</sup> )   |
| unknown    | 572.3001   | 10.71                | 258.1089          | 1.80 | 0.74 | 2.11 | 1.02 | ↑     | ↓   | Plasma<br>(ESI <sup>+</sup> ) |
| unknown    | 666.3116   | 14.91                | 648.2903          | 2.26 | 0.71 | 1.83 | 1.87 | ↑     | ↓   | Plasma<br>(ESI <sup>-</sup> ) |
| unknown    | 763.5887   | 25.00                | 282.0514          | 0.66 | 1.67 | 1.22 | 1.01 | ↓     | ↑   | Plasma<br>(ESI <sup>+</sup> ) |

C: Control, M: Model, Q: QYSLD

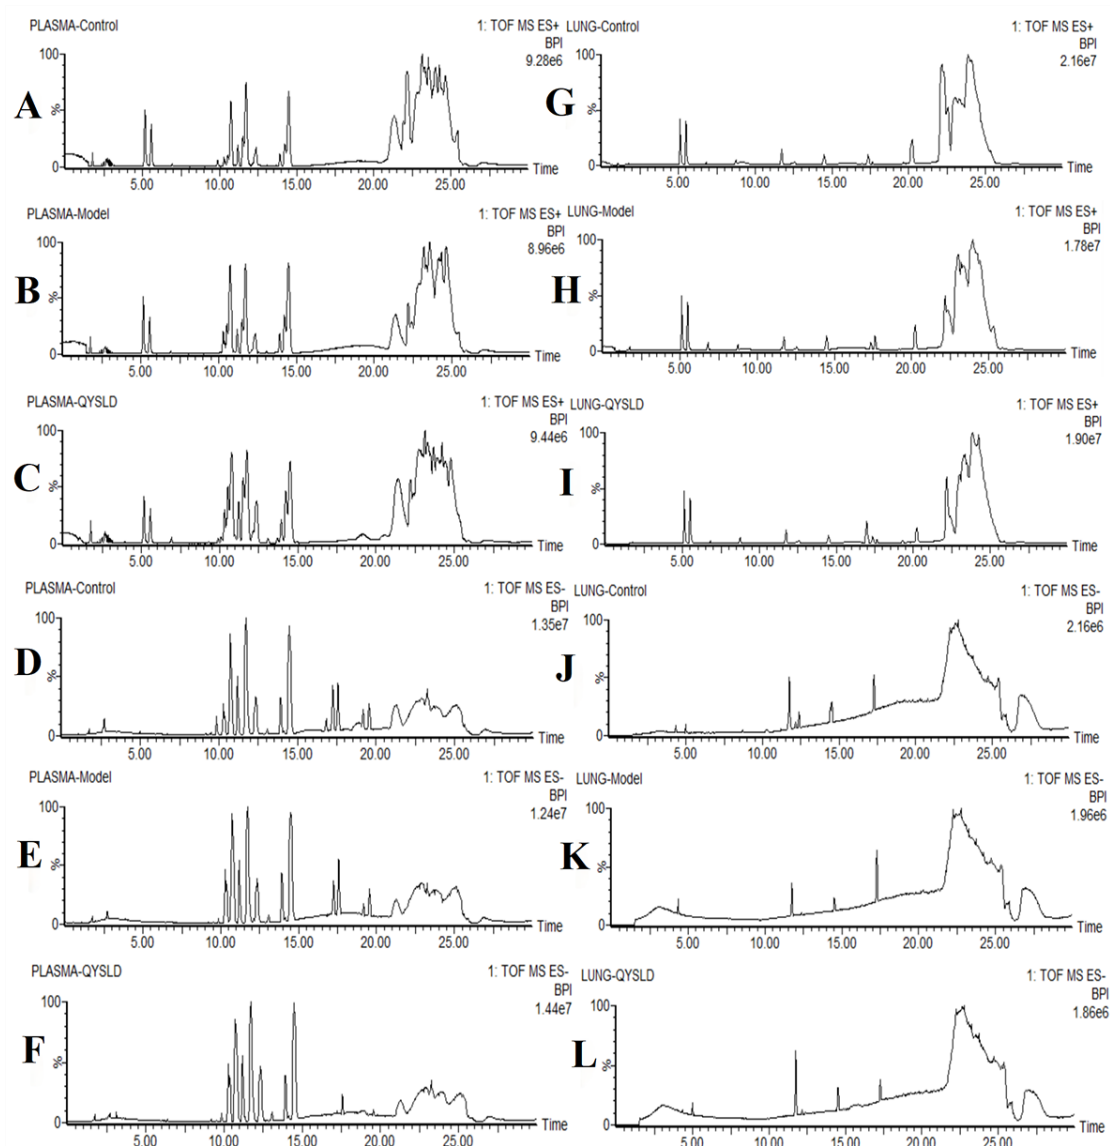

Figure S1 Representative BPIs of rat plasma samples of control (A, D), model (B, E) and QYSLD groups (C, F) acquired in the ESI<sup>+</sup> and ESI<sup>-</sup> mode by UPLC-Q-TOF/MS; Representative BPIs of rats lung tissue samples of control (G, J), model (H, K) and QYSLD groups (I, L) acquired in the ESI<sup>+</sup> and ESI<sup>-</sup> mode by UPLC-Q-TOF/MS.

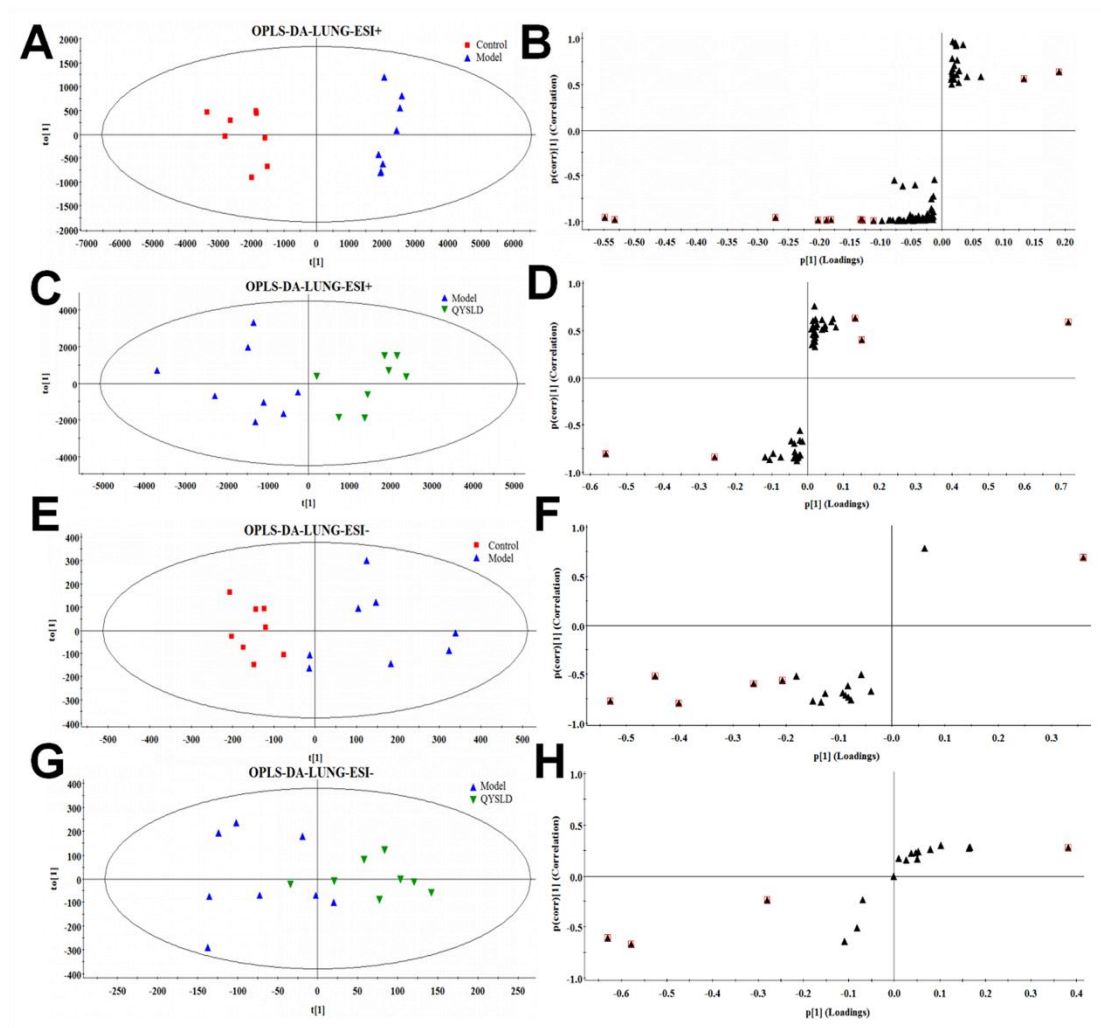

Figure S2 Lung OPLS-DA score plots and their corresponding S-plots in dual ESI ion mode of the control group and model group (ESI<sup>+</sup> mode: (A, B) ( $R^2Y=95\%$ ,  $Q^2=93\%$ ,  $p[CV-ANOVA]=1.20\times10^{-6}$ ); ESI<sup>-</sup> mode: (E, F) ( $R^2Y=72\%$ ,  $Q^2=62\%$ ,  $p[CV-ANOVA]=1.39\times10^{-2}$ )). Lung OPLS-DA score plots and their corresponding S-plots in dual ESI ion mode of the model group and QYSLD group (ESI<sup>+</sup> mode: (C, D) ( $R^2Y=75\%$ ,  $Q^2=65\%$ ,  $p[CV-ANOVA]=5.81\times10^{-3}$ ); ESI<sup>-</sup> mode: (G, H) ( $R^2Y=45\%$ ,  $Q^2=41\%$ ,  $p[CV-ANOVA]=2.9\times10^{-2}$ )).

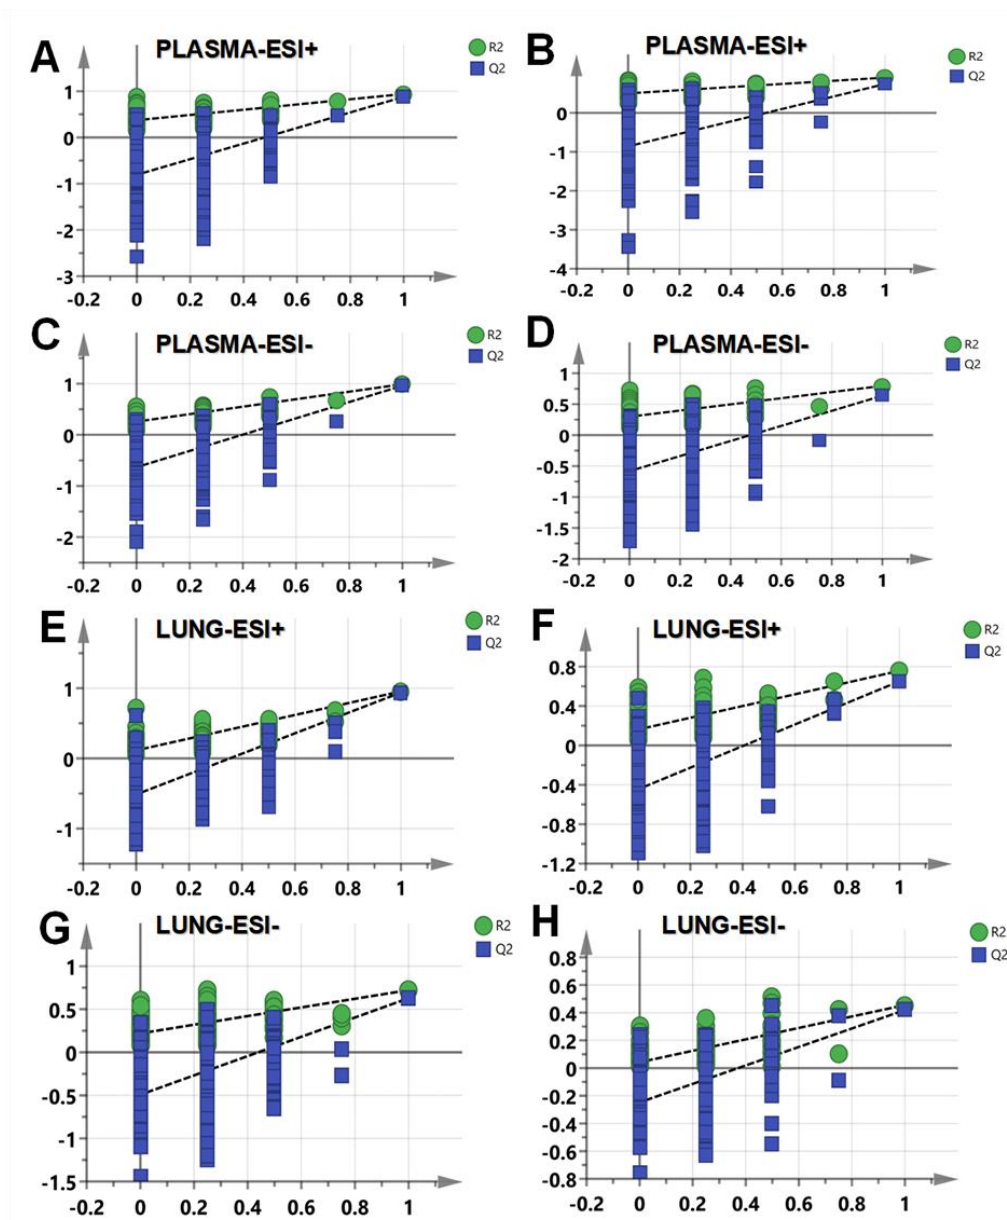

Figure S3 Permutation test plots of plasma samples in ESI<sup>+</sup> mode (A) and ESI<sup>-</sup> mode (C) for the control and model groups; permutation test plots of plasma samples in ESI<sup>+</sup> mode (B) and ESI<sup>-</sup> mode (D) for the model and QYSLD groups. Permutation test plots of lung tissue samples in ESI<sup>+</sup> mode (E) and ESI<sup>-</sup> mode (G) for the control and model groups; permutation test plots of lung tissue samples in ESI<sup>+</sup> mode (F) and ESI<sup>-</sup> mode (H) for the model and QYSLD groups.
